# Supplementary material
Source: PubMed Central journal article supplement (PMC4030777)
Supplement: supp_ddu032_ddu032supp.pdf [file supp_ddu032_ddu032supp.pdf]

## SUPPLEMENTARY METHODS AND RESULTS

### FMRP lysis buffer optimization

*Initial lysis protocol* – Frozen tissue powder was resuspended in RIPA lysis buffer (Boston Bioproducts, Ashland, MA), supplemented with Complete protease inhibitors (Roche Applied Science, Indianapolis, IN) at a final concentration of 1 mg tissue per 15 µl buffer. Cell lysis was allowed to proceed overnight at 4°C on an end-over-end rotator, then the lysates were cleared by centrifugation at 16,100 x g for 20 minutes at 4°C and supernatants were carefully removed and stored at -80°C. We determined the protein concentration of each sample using the BCA protein assay kit (Pierce, Rockford, IL), according to manufacturer's microplate instructions, and then separated 10 µg of each sample by electrophoresis.

*Western blot complications* – We noticed that, over time, mouse protein lysates became cloudy after freeze-thawing. While all of the FMRP Western blots had been performed with fresh frozen tissue, the large variation in FMRP levels led us to test whether FMRP was precipitating out of the lysis buffer. We therefore measured FMRP levels in the precipitation and soluble fractions of several lysates by pelleting at 16,100 xg for 15 min and resuspending the pellets in RIPA buffer at an equal volume as the supernatant. As can be seen in Supplementary Material, Fig. S6A, both FMRP and Gapdh were found in the pellet fractions.

We next tested the repeatability of our Western-blot method by measuring FMRP in a subset of mouse samples in 2 separate experiments, using fresh lysates from frozen brain samples each time. To account for experiment-to-experiment variation, the FMRP values were transformed into Z-scores and graphed as a Z-Z plot (Supplementary Material, Fig. S1A). The Z-score is a standard measure, representing an individual value's departure from the group mean (1). The Z-score of each FMRP measurement in a single experiment is obtained by the following formula:

$$\text{Z-score} = (\text{FMRP level}_M - \text{mean FMRP level}_{M1\dots Mn}) / \text{Standard Deviation}_{M1\dots Mn}$$

where M refers to an individual mouse, and M1-Mn represents the entire group. As a result of Z-score transformation, the group's mean is 0, with the average standard deviation set to 1, and samples values are plotted as units of standard deviation away from the mean. Regardless of inter-experimental variations, a sample should maintain its *relative* value compared to the rest of the group; a perfect Z-Z plot has a regression line of  $y=x$ . It is clear from Supplementary Material, Fig. S1A that FMRP measurements were not consistent between replicate measurements; samples that had low FMRP expression in one experiment had a range of expression, from high to low FMRP levels, in the replicate experiment ( $R^2 = 0.23$ ).

Simultaneously, in an effort to solubilize precipitation proteins, 3 replicate lysates of a mouse sample that had been stored at  $-80^\circ\text{C}$  for between 1 month and 2 years were treated by either heat ( $95^\circ\text{C}$ , 5 min), 2-mercaptoethanol, 1% SDS, or 2 M urea. Western blot quantification showed that none of the treatments equalized FMRP levels across the 3 replicates (data not shown), therefore we sought a new lysis treatment.

*Protein lysis with high SDS and 2-mercaptoethanol* –PEB lysis buffer followed by moderate heating ( $70^\circ\text{C}$ ) was tested for mouse-brain lysis, as it has been reported to result in 98% solubilization of brain tissue (2). Following this protocol, we saw little to no pellet during the lysis procedure. FMRP measurements after PEB lysis-buffer optimization were replicable, as can be seen in a Z-Z plot (Supplementary Material, Fig. S1B;  $R^2 = 0.92$ ). Using this modified extraction method, we analyzed the variation of raw FMRP and GAPDH levels for our fiducial animal/sample (12 CGG repeats) for constant total protein loading (by BCA), in duplicate, across 7 Western blots ( $n=14$  each for FMRP and GAPDH assays; 7 Westerns, samples run in duplicate). The results of this fiducial analysis (Supplementary Material, Fig. S2A) indicate that there is no difference in the variation in FMRP and GAPDH values (normalized sample means;

SDEV = 0.50 and 0.66 for FMRP and GAPDH, respectively). We extended this analysis to the distribution of FMRP and GAPDH values for all samples of normal genotype across the seven Western blots (n = 116 each for FMRP and GAPDH assays; 7 Westerns, samples run in duplicate; Supplementary Material, Fig. S2B). Again, there was no significant difference in the standard deviations for the two assays (SDEV = 0.45 and 0.32 for FMRP and GAPDH, respectively).

**Table S1.** The effects of age, brain region, and CGG repeat on FMRP levels in mice of different ages. A three-way ANOVA was performed and the least square means calculated in order to assess the main effects of genotype, brain region, and age (**A**), as well as the interactions of these variables (**B**). Non-significant P-values are emphasized in red font.

**A.**

| <b>Comparison</b> |                | <b><i>P</i> value</b> |
|-------------------|----------------|-----------------------|
| wt                | CGG            | < 0.001               |
| Cerebellum        | Hippocampus    | < 0.001               |
| Cerebellum        | Frontal Cortex | < 0.001               |
| Hippocampus       | Frontal Cortex | < 0.001               |
| P0                | P140           | <0.001                |
| P0                | P21            | <0.001                |
| P0                | P14            | <0.001                |
| P0                | P35            | <0.001                |
| P35               | P140           | <0.001                |
| P35               | P21            | <0.001                |
| P35               | P14            | <0.001                |
| P21               | P140           | 0.005                 |
| P14               | P140           | 0.006                 |
| P21               | P14            | 0.961                 |

**B.**

| <b>Comparison</b>                       |                | <b><i>P</i> value</b> |
|-----------------------------------------|----------------|-----------------------|
| <b>Brain region within wt</b>           |                |                       |
| Cerebellum                              | Hippocampus    | < 0.001               |
| Cerebellum                              | Frontal Cortex | < 0.001               |
| Hippocampus                             | Frontal Cortex | < 0.001               |
| <b>Brain region within expanded CGG</b> |                |                       |
| Cerebellum                              | Hippocampus    | < 0.001               |
| Cerebellum                              | Frontal Cortex | 0.009                 |
| Hippocampus                             | Frontal Cortex | 0.012                 |
| <b>Age within wt</b>                    |                |                       |

|     |      |         |
|-----|------|---------|
| P0  | P140 | < 0.001 |
| P0  | P21  | < 0.001 |
| P0  | P14  | < 0.001 |
| P0  | P35  | < 0.001 |
| P35 | P140 | < 0.001 |
| P35 | P21  | 0.001   |
| P35 | P14  | 0.001   |
| P21 | P140 | 0.007   |
| P14 | P140 | 0.007   |
| P21 | P14  | 0.961   |

---

**Age within expanded CGG**

|     |      |         |
|-----|------|---------|
| P0  | P140 | < 0.001 |
| P0  | P21  | < 0.001 |
| P0  | P14  | < 0.001 |
| P0  | P35  | < 0.001 |
| P35 | P140 | < 0.001 |
| P35 | P21  | 0.050   |
| P35 | P14  | 0.049   |
| P21 | P140 | 0.433   |
| P14 | P140 | 0.358   |
| P21 | P14  | 0.984   |

---

**Genotype within Cerebellum**

|    |     |        |
|----|-----|--------|
| wt | CGG | <0.001 |
|----|-----|--------|

---

**Genotype within Frontal Cortex**

|    |     |        |
|----|-----|--------|
| wt | CGG | <0.001 |
|----|-----|--------|

---

**Genotype within Hippocampus**

|    |     |       |
|----|-----|-------|
| wt | CGG | 0.079 |
|----|-----|-------|

---

**Age within cerebellum**

|     |      |         |
|-----|------|---------|
| P0  | P140 | < 0.001 |
| P0  | P21  | < 0.001 |
| P0  | P14  | < 0.001 |
| P0  | P35  | < 0.001 |
| P35 | P140 | 0.959   |
| P35 | P21  | 0.010   |

|     |      |         |
|-----|------|---------|
| P35 | P14  | < 0.001 |
| P21 | P140 | 0.002   |
| P14 | P140 | < 0.001 |
| P21 | P14  | 0.234   |

---

**Age within frontal cortex**

|     |      |         |
|-----|------|---------|
| P0  | P140 | < 0.001 |
| P0  | P21  | < 0.001 |
| P0  | P14  | < 0.001 |
| P0  | P35  | 0.238   |
| P35 | P140 | < 0.001 |
| P35 | P21  | < 0.001 |
| P35 | P14  | < 0.001 |
| P21 | P140 | 0.090   |
| P14 | P140 | 0.168   |
| P21 | P14  | < 0.001 |

---

**Age within hippocampus**

|     |      |         |
|-----|------|---------|
| P0  | P140 | < 0.001 |
| P0  | P21  | < 0.001 |
| P0  | P14  | < 0.001 |
| P0  | P35  | < 0.001 |
| P35 | P140 | 0.051   |
| P35 | P21  | 0.047   |
| P35 | P14  | 0.655   |
| P21 | P140 | 0.871   |
| P14 | P140 | 0.147   |
| P21 | P14  | 0.150   |

---

**Brain Region within P0**

|             |                |       |
|-------------|----------------|-------|
| Hippocampus | Frontal Cortex | 0.016 |
| Cerebellum  | Frontal Cortex | 0.014 |
| Hippocampus | Cerebellum     | 0.932 |

---

**Brain Region within P14**

|             |                |        |
|-------------|----------------|--------|
| Hippocampus | Frontal Cortex | 0.253  |
| Cerebellum  | Frontal Cortex | <0.001 |
| Hippocampus | Cerebellum     | <0.001 |

---

**Brain Region within P21**

|             |                |        |
|-------------|----------------|--------|
| Hippocampus | Frontal Cortex | <0.001 |
| Cerebellum  | Frontal Cortex | <0.001 |
| Hippocampus | Cerebellum     | <0.001 |

---

**Brain Region within P35**

|             |                |        |
|-------------|----------------|--------|
| Hippocampus | Frontal Cortex | <0.001 |
| Cerebellum  | Frontal Cortex | <0.001 |
| Hippocampus | Cerebellum     | 0.017  |

---

**Brain Region within P140**

|             |                |        |
|-------------|----------------|--------|
| Hippocampus | Frontal Cortex | 0.010  |
| Cerebellum  | Frontal Cortex | <0.001 |
| Hippocampus | Cerebellum     | <0.001 |

---

**Genotype within P0**

|    |     |        |
|----|-----|--------|
| wt | CGG | <0.001 |
|----|-----|--------|

---

**Genotype within P14**

|    |     |       |
|----|-----|-------|
| wt | CGG | 0.004 |
|----|-----|-------|

---

**Genotype within P21**

|    |     |       |
|----|-----|-------|
| wt | CGG | 0.002 |
|----|-----|-------|

---

**Genotype within P35**

|    |     |        |
|----|-----|--------|
| wt | CGG | <0.001 |
|----|-----|--------|

---

**Genotype within P140**

|    |     |       |
|----|-----|-------|
| wt | CGG | 0.173 |
|----|-----|-------|

---

**Table S2.** FMRP levels in mice with premutation repeats as reported in the literature. Two separate strains are reported; the strain used in the current study was engineered by Willemsen et. al (9)<sup>1</sup>, while a second strain was developed by Entezam et al. (7)<sup>2</sup>. Data are depicted in **Supplementary Material, Fig. S4.**

| <b>Reference</b>             | <b>n Animals</b> | <b>CGG repeat</b>    | <b>% FMRP</b> |
|------------------------------|------------------|----------------------|---------------|
|                              | 1                | 70                   | 110           |
| Brouwer, 2008a <sup>1</sup>  | 10               | 100-150              | 60            |
|                              | 5                | 151-200              | 42            |
|                              | 9                | >200                 | 38            |
| Brouwer, 2007 <sup>1</sup>   | 1                | 230                  | 21            |
|                              | 1                | 230                  | 5             |
|                              | 1                | 230                  | 51            |
| Brouwer, 2008b <sup>1</sup>  | 1                | 112                  | 100           |
|                              | 1                | 129                  | 100           |
|                              | 1                | 174                  | 80            |
|                              | 1                | 184                  | 70            |
| Berman, 2012 <sup>1</sup>    | 12               | 84-210 (138.6 ±12.0) | 72            |
| Willemsen, 2003 <sup>1</sup> | 2                | 105                  | ~100          |
| Entezam, 2007 <sup>2</sup>   | 1                | 130                  | 47            |
|                              | 1                | 190                  | 14            |
|                              | 1                | 210                  | 8             |
| Qin, 2011 <sup>2</sup>       | 3                | 132                  | 15            |



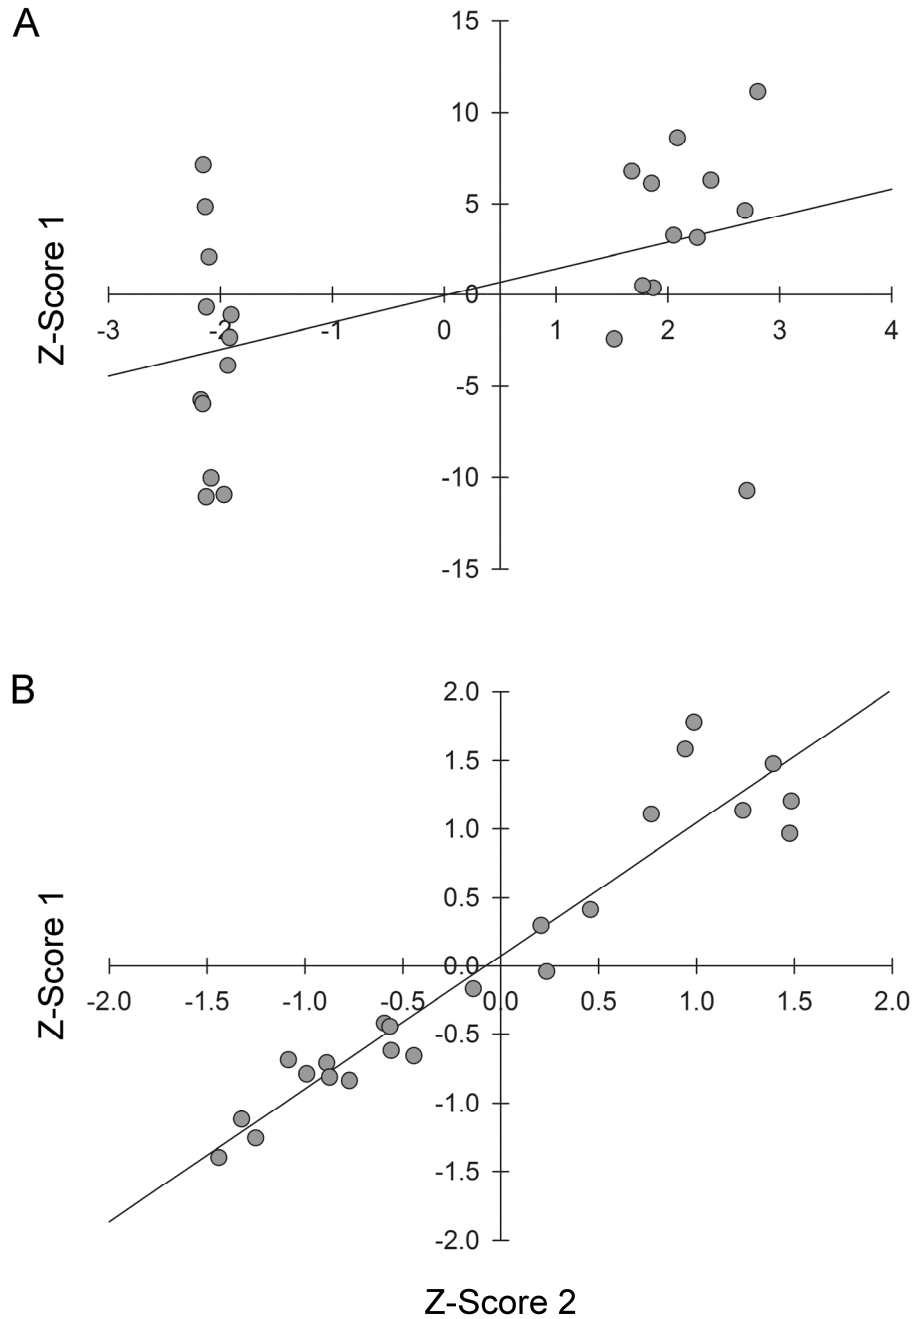

**Figure S1.** Z-Z plots of mouse FMRP levels before (A) and after (B) lysis buffer optimization. Z-scores of replicate experiments were plotted against each other in order to determine the experimental repeatability of FMRP Western blots. **(A)** Original lysis buffer. FMRP levels were measured in 12 wt, 10 low-repeat (<120 CGG), and 2 large-repeat (>200 CGG) mice in two separate experiments starting with frozen brain tissue. Linear regression:  $Z\text{-Score } 1 = 0.0376 + (0.160 * Z\text{-Score } 2)$ .  $R^2 = 0.23$ . **(B)** PEB lysis buffer. FMRP levels were measured in 12 wt, 3 low-repeat (<120 CGG), 2 mid-repeat (120-200), and 6 high-repeat (>200) mice. Linear regression:  $Z\text{-Score } 1 = -0.0763 + (0.944 * Z\text{-Score } 2)$ .  $R^2 = 0.92$ .

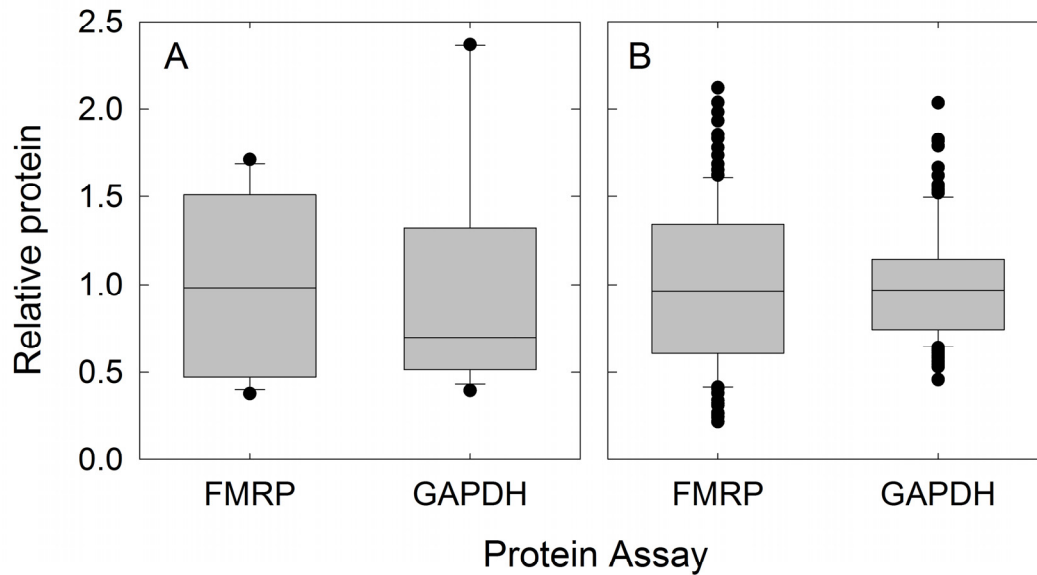

**Figure S2.** (A) Box plots of the distributions of raw FMRP and GAPDH levels for a single fiducial animal/sample (12 CGG repeats) for constant total protein loading (by BCA), in duplicate, across 7 Western blots (n=14 each for FMRP and GAPDH assays; 7 Westerns, samples run in duplicate); for normalized sample means = 1.0; SDEV = 0.50 and 0.66 for FMRP and GAPDH, respectively). (B) Analysis to the distribution of FMRP and GAPDH values for all samples of normal genotype across the 7 Western blots (n = 116 each for FMRP and GAPDH assays; 7 Westerns, samples run in duplicate); for normalized sample means = 1.0; SDEV = 0.45 and 0.32 for FMRP and GAPDH, respectively.

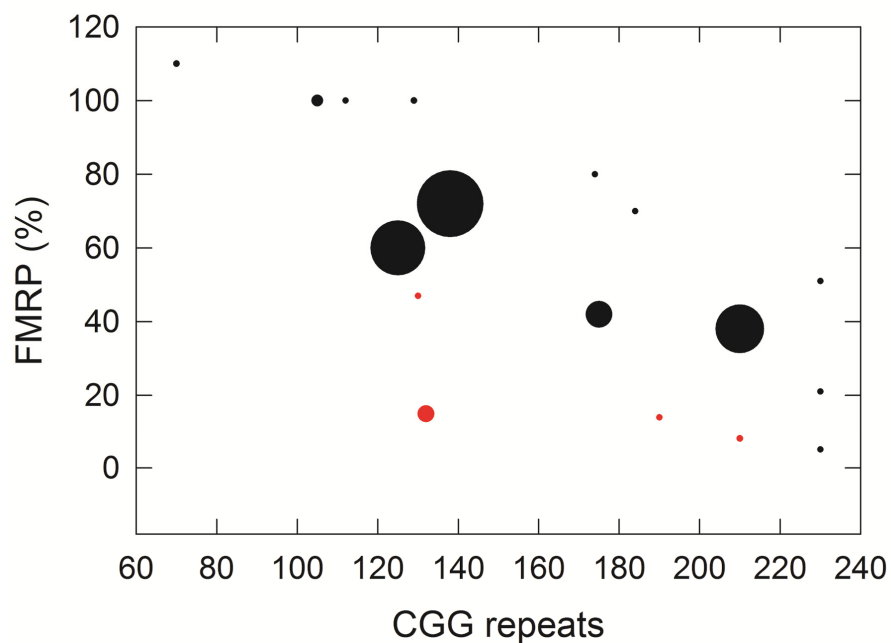

**Figure S3.** Approximate FMRP levels from 2 premutation CGG-repeat KI mouse lines, as reported in the literature (3-9). FMRP measurements from fresh brain tissue (uncultured), from either the line used in the current study (black circles; (10)), or the Entezam et al. (7) mouse line (red circles), were included. As some FMRP and CGG-repeat values were reported as averages, the size of each circle represents the number of animals included in each point.

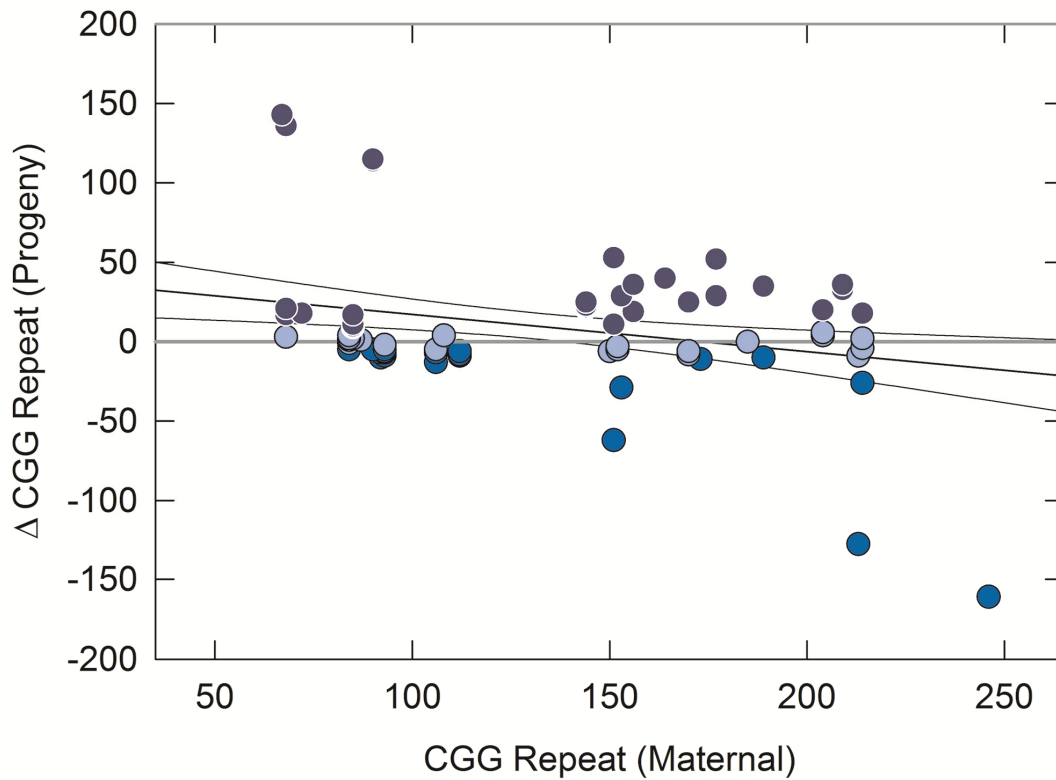

**Figure S4.** Expansion, contraction, or retention of the CGG repeat in the progeny versus the dam's repeat length. Thirty-nine mice with CGG-repeat expansions (dark blue), 29 with contractions (medium blue), and 27 with repeat-length changes that were within 5% of maternal CGG repeats (light blue) are contrasted to the repeat of each animal's mother. There is no significant relationship between maternal CGG repeat and offspring CGG repeat ( $R^2 = 0.0831$ ).

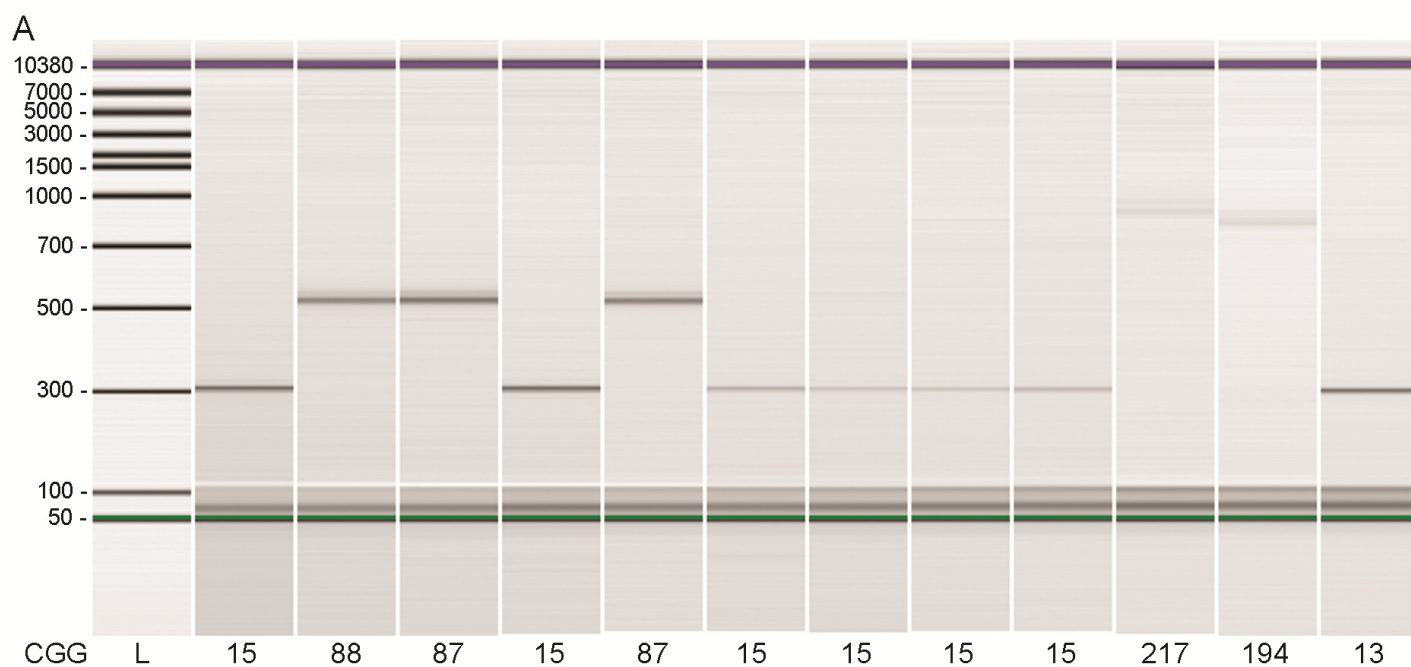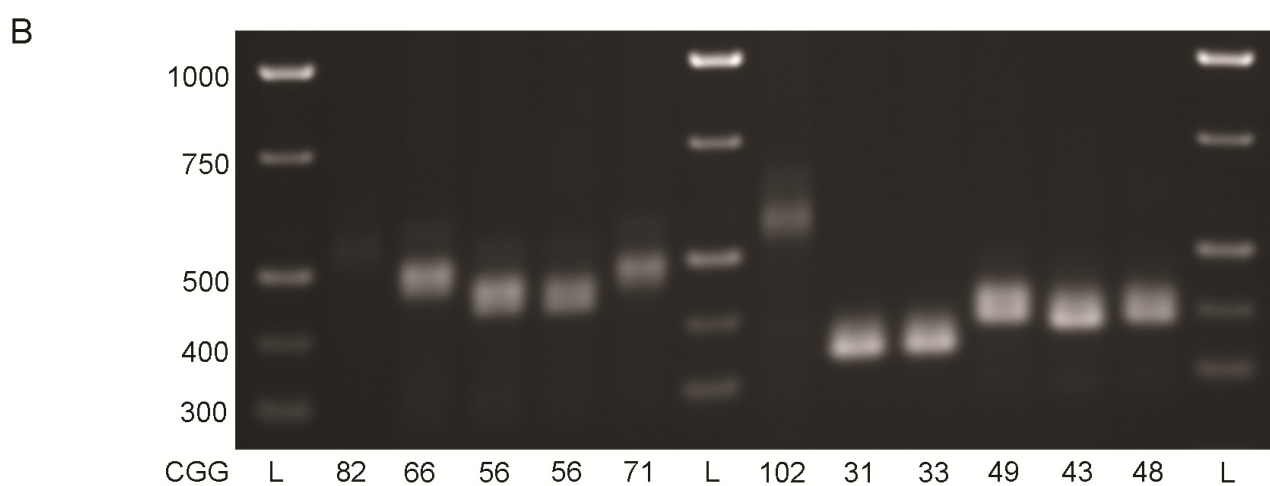

**Figure S5.** CGG-repeat sizing of amplicons that span the CGG repeat in mouse and human DNA samples. **(A)** A digital gel trace from a Bioanalyzer on-chip flow cytometer showing Asuragen-amplified mouse PCR products. The amplicon is 263 bp plus the CGG repeat. **(B)** Agarose gel of human PCR amplifications, which are 264 bp plus the CGG repeat. L, DNA ladder; numbers are calculated CGG-repeat lengths.

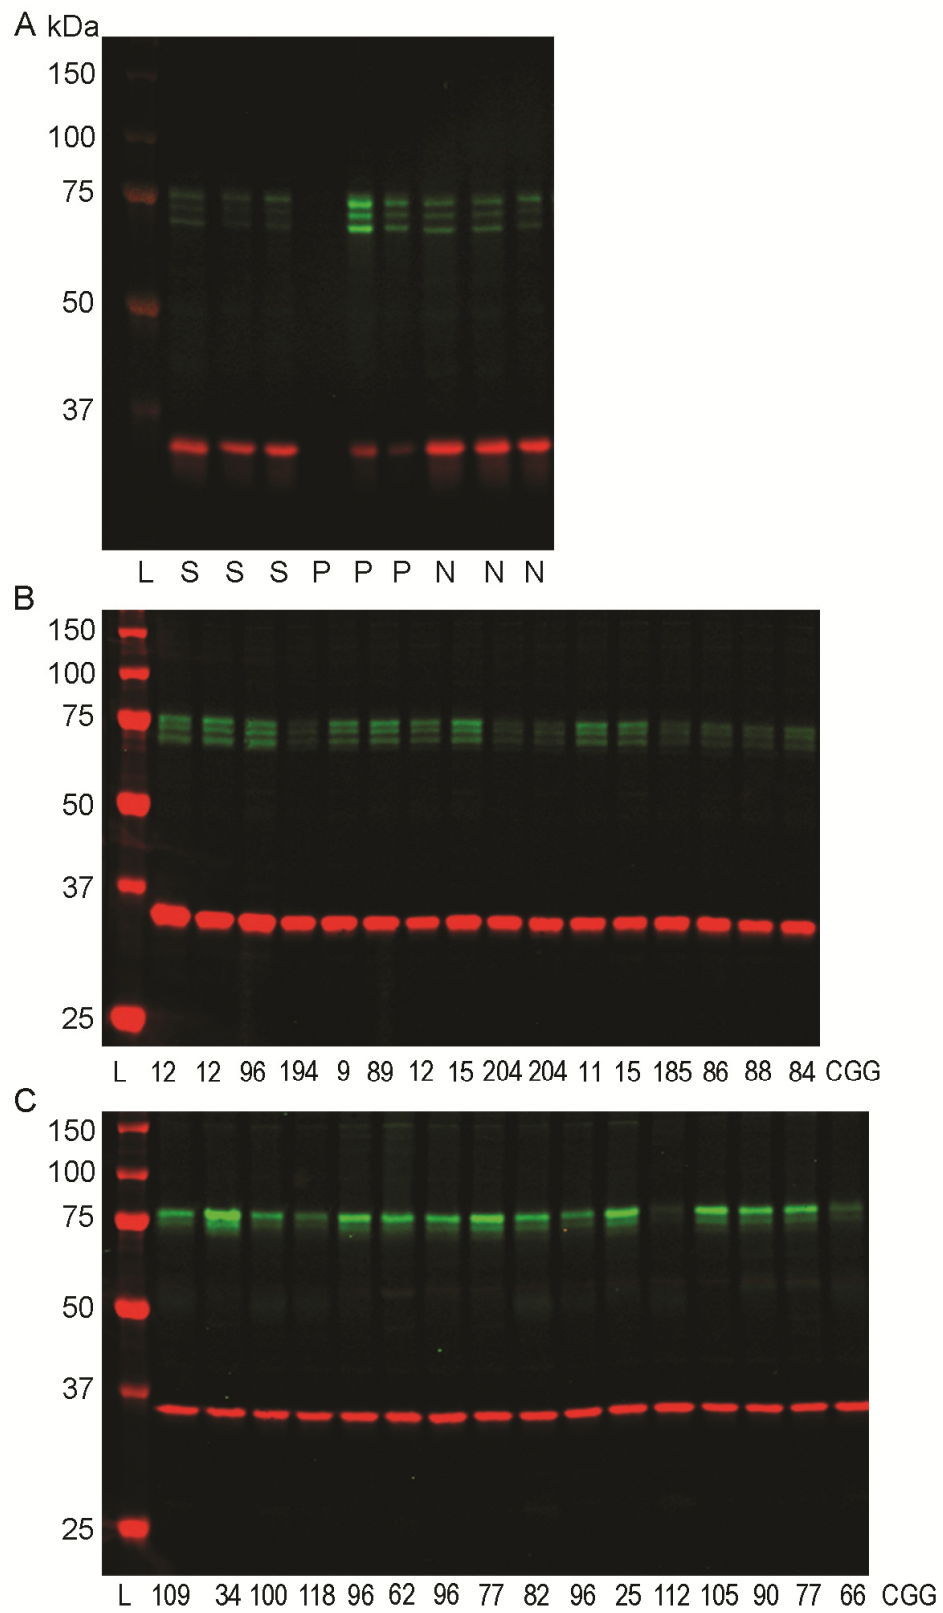

**Figure S6.** Western blots for FMRP expression in mice and humans of varying CGG repeats. **(A)** Western blot of a single mouse brain that was extracted on 3 separate occasions in RIPA

buffer and then stored at  $-80^{\circ}\text{C}$  for up to a year, showing FMRP (green) and Gapdh (red) in the insoluble, pelleted fraction. L, ladder; S, Supernatant; P, Pellet; N, No treatment. Representative Western blot of FMRP and Gapdh in mouse brain hemispheres (**B**) and human frontal cortex (**C**) after lysis-buffer optimization. Numbers across the bottom are CGG repeat lengths. Note the differences in FMRP expression with CGG repeat, as well as the number of FMRP splice isoforms. Blots were imaged using the LI-COR Odyssey for IRDye-secondary antibodies.

## REFERENCES

1. Cheadle, C., Vawter, M.P., Freed, W.J. and Becker, K.G. (2003) Analysis of microarray data using Z score transformation. *J. Mol. Diagn.*, **5**, 73-81.
2. Ericsson, C. and Nister, M. (2011) Protein extraction from solid tissue. *Methods Mol. Biol.*, **675**, 307-312.
3. Berman, R.F., Murray, K.D., Arque, G., Hunsaker, M.R. and Wenzel, H.J. (2012) Abnormal dendrite and spine morphology in primary visual cortex in the CGG knock-in mouse model of the fragile X premutation. *Epilepsia*, **53 Suppl 1**, 150-160.
4. Brouwer, J.R., Huizer, K., Severijnen, L.A., Hukema, R.K., Berman, R.F., Oostra, B.A. and Willemsen, R. (2008) CGG-repeat length and neuropathological and molecular correlates in a mouse model for fragile X-associated tremor/ataxia syndrome. *J. Neurochem.*, **107**, 1671-1682.
5. Brouwer, J.R., Mientjes, E.J., Bakker, C.E., Nieuwenhuizen, I.M., Severijnen, L.A., Van der Linde, H.C., Nelson, D.L., Oostra, B.A. and Willemsen, R. (2007) Elevated *Fmr1* mRNA levels and reduced protein expression in a mouse model with an unmethylated Fragile X full mutation. *Exp. Cell Res.*, **313**, 244-253.
6. Brouwer, J.R., Severijnen, E., de Jong, F.H., Hessel, D., Hagerman, R.J., Oostra, B.A. and Willemsen, R. (2008) Altered hypothalamus-pituitary-adrenal gland axis regulation in the expanded CGG-repeat mouse model for fragile X-associated tremor/ataxia syndrome. *Psychoneuroendocrinology*, **33**, 863-873.
7. Entezam, A., Biacsi, R., Orrison, B., Saha, T., Hoffman, G.E., Grabczyk, E., Nussbaum, R.L. and Usdin, K. (2007) Regional FMRP deficits and large repeat expansions into the full mutation range in a new Fragile X premutation mouse model. *Gene*, **395**, 125-134.
8. Qin, M., Entezam, A., Usdin, K., Huang, T., Liu, Z.H., Hoffman, G.E. and Smith, C.B. (2011) A mouse model of the fragile X premutation: effects on behavior, dendrite morphology, and regional rates of cerebral protein synthesis. *Neurobiol. Dis.*, **42**, 85-98.



9. Willemsen, R., Hoogeveen-Westerveld, M., Reis, S., Holstege, J., Severijnen, L.A., Nieuwenhuizen, I.M., Schrier, M., van Unen, L., Tassone, F., Hoogeveen, A.T. *et al.* (2003) The *FMR1* CGG repeat mouse displays ubiquitin-positive intranuclear neuronal inclusions; implications for the cerebellar tremor/ataxia syndrome. *Hum. Mol. Genet.*, **12**, 949-959.
10. Bontekoe, C.J., Bakker, C.E., Nieuwenhuizen, I.M., van der Linde, H., Lans, H., de Lange, D., Hirst, M.C. and Oostra, B.A. (2001) Instability of a (CGG)<sub>98</sub> repeat in the *Fmr1* promoter. *Hum. Mol. Genet.*, **10**, 1693-1699.
